# Supplementary material
Source: MDPI journal article supplement (https://www.mdpi.com/2071-1050/16/10/4188)
Supplement: s1 [file s1]

## Supporting Information (SI)

### Regional Differences and Spatial-temporal Evolution Characteristics of Digital Economy Development in Yangtze River Economic Belt

Jiayi Chen <sup>a</sup>, Chaozhu Hu <sup>a</sup> and Youxi Luo <sup>a,\*</sup>

<sup>a</sup> School of Science, Hubei University of Technology, Wuhan 430068, China

\*Corresponding Authors: E-mail: 20051038@hbut.edu.cn

**Table S1.** The indicators of digital economy evaluation system with the corresponding weight.

| dimensions                                 |                           | Weight | Specific index                                                                                                               | Weight |
|--------------------------------------------|---------------------------|--------|------------------------------------------------------------------------------------------------------------------------------|--------|
| First-level                                | Second-level              |        |                                                                                                                              |        |
| Digital Infrastructure                     | Infrastructure            | 0.208  | Number of Domain Names (units /10 million people)                                                                            | 0.036  |
|                                            |                           |        | Number of Web Pages (units / 10 million people)                                                                              | 0.079  |
|                                            |                           |        | Internet Broadband Access Ports (units /10 million people)                                                                   | 0.020  |
|                                            |                           |        | Number of IPv4 Addresses (units / 10 million people)                                                                         | 0.042  |
|                                            |                           |        | Length of Long-distance Optical Cable (km / 10 million people)                                                               | 0.031  |
|                                            | Operational Level         | 0.092  | Mobile Internet Users (10k households)                                                                                       | 0.027  |
|                                            |                           |        | Mobile Phone Penetration Rate (units / 100 people)                                                                           | 0.024  |
|                                            |                           |        | Mobile Internet Access Traffic (10k GB)                                                                                      | 0.020  |
|                                            |                           |        | Internet Broadband Access Users (10k households)                                                                             | 0.021  |
| Development of Digital Economic Innovation | Input                     | 0.104  | CMTED R&D Expenditure Internal Spending / CMTED Total Output Value (%)                                                       | 0.021  |
|                                            |                           |        | CMTED R&D Personnel Number / CMTED Workforce (%)                                                                             | 0.026  |
|                                            |                           |        | CMTED New Product Development Expenditure / CMTED Total Output Value (%)                                                     | 0.018  |
|                                            |                           |        | CMTED Technology Introduction and Renovation Expenditure / CMTED Total Output Value (%)                                      | 0.039  |
|                                            |                           |        | Transaction Volume of the Technology Market (10000 CNY)                                                                      | 0.042  |
|                                            | Output                    | 0.094  | Per Capita Annual Effective Patent Applications Granted (pieces / person-year)                                               | 0.052  |
|                                            |                           |        | Number of Foreign-invested Enterprises in the Region (units)                                                                 | 0.061  |
|                                            |                           |        | Registered Capital of Foreign-invested Enterprises/GDP (%)                                                                   | 0.043  |
|                                            |                           |        | CMTED foreign investment/ Total foreign investment (%)                                                                       | 0.033  |
| Social Livelihood Benefits                 | International Cooperation | 0.170  | CMTED total exports / CMTED total output value (%)                                                                           | 0.034  |
|                                            |                           |        | Number of Terminals in Public Library Electronic Reading Rooms (units)                                                       | 0.011  |
|                                            |                           |        | Comprehensive Population Coverage Rate of Broadcasting Programs (%)                                                          | 0.003  |
|                                            |                           |        | E-commerce sales volume (billion CNY)                                                                                        | 0.039  |
|                                            | Digital Life              | 0.114  | Per Capita Express Deliveries (items per person)                                                                             | 0.061  |
|                                            |                           |        | Fixed Asset Investment Intensity in Agriculture, Forestry, Animal Husbandry, and Fishery (billion CNY per thousand hectares) | 0.032  |
|                                            |                           |        | Number of Agricultural Meteorological Observation Stations (units)                                                           | 0.013  |
|                                            |                           |        | Proportion of Administrative Villages with Postal Services (%)                                                               | 0.001  |
|                                            | Digital Agriculture       | 0.093  | Degree of Agricultural Mechanization (10k KW/km <sup>2</sup> )                                                               | 0.047  |
|                                            |                           |        | Number of Electronic Publications Published (units)                                                                          | 0.040  |
|                                            |                           |        | Quantity of Electronic Publications Published (10000 sheets)                                                                 | 0.076  |
|                                            |                           |        | Retail Price Index of Books, Newspapers, Magazines, and Electronic Publications (-)                                          | 0.009  |

**Table S2.** Calculated digital economy index from 2012 to 2021

|                    | Index     | 2012   | 2013   | 2014   | 2015   | 2016   | 2017   | 2018   | 2019   | 2020   | 2021   |
|--------------------|-----------|--------|--------|--------|--------|--------|--------|--------|--------|--------|--------|
| Lower Reaches      | Shanghai  | 31.752 | 34.364 | 36.371 | 38.856 | 42.236 | 42.053 | 43.079 | 44.032 | 46.732 | 49.364 |
|                    | Jiangsu   | 27.645 | 31.078 | 30.065 | 32.502 | 33.404 | 35.385 | 36.677 | 39.892 | 40.370 | 43.997 |
|                    | Zhejiang  | 24.462 | 25.526 | 28.503 | 30.456 | 32.911 | 36.631 | 37.994 | 41.020 | 44.004 | 46.985 |
|                    | Anhui     | 10.619 | 10.725 | 9.682  | 11.287 | 10.826 | 12.972 | 14.192 | 12.815 | 15.257 | 17.285 |
| Lower Reaches_Avg  |           | 25.423 | 26.155 | 28.275 | 29.844 | 31.760 | 32.986 | 34.440 | 36.591 | 39.408 | 25.423 |
| Middle Reaches     | Jiangxi   | 8.398  | 8.103  | 8.126  | 8.230  | 8.435  | 9.753  | 10.338 | 11.049 | 11.471 | 12.123 |
|                    | Hubei     | 12.959 | 13.755 | 15.463 | 15.455 | 14.811 | 16.293 | 17.146 | 18.018 | 18.405 | 19.975 |
|                    | Hunan     | 20.308 | 13.080 | 13.136 | 13.552 | 16.758 | 18.986 | 18.762 | 17.979 | 20.698 | 23.041 |
| Middle Reaches_Avg |           | 11.646 | 12.242 | 12.412 | 13.335 | 15.011 | 15.415 | 15.682 | 16.858 | 18.380 | 11.646 |
| Upper Reaches      | Chongqing | 5.666  | 7.953  | 8.813  | 10.404 | 10.070 | 10.430 | 11.526 | 11.713 | 11.575 | 11.896 |
|                    | Sichuan   | 14.259 | 13.652 | 16.004 | 15.670 | 16.750 | 17.459 | 20.937 | 23.286 | 25.999 | 26.392 |
|                    | Guizhou   | 12.225 | 14.895 | 11.728 | 9.765  | 10.039 | 8.922  | 10.883 | 12.496 | 12.251 | 13.449 |
|                    | Yunnan    | 7.404  | 7.940  | 8.029  | 8.238  | 8.286  | 8.782  | 9.281  | 9.876  | 9.718  | 10.874 |
| Upper Reaches_Avg  |           | 11.110 | 11.144 | 11.019 | 11.286 | 11.398 | 13.157 | 14.343 | 14.886 | 15.653 | 11.110 |
| Average Score      |           | 15.973 | 16.461 | 16.902 | 17.674 | 18.593 | 19.788 | 20.983 | 22.016 | 23.317 | 25.034 |
